# Supplementary material for: Electrocatalytic hydrogenation of furfural paired with photoelectrochemical oxidation of water and furfural in batch and flow cells
Source: Royal Society of Chemistry journal article supplement (doi:10.1039/d1re00080b), 2021-01-01
Supplement: d1re00080b1.pdf [file d1re00080b1.pdf]

1 **Electrocatalytic hydrogenation of furfural paired with photoelectrochemical oxidation**  
2 **of water and furfural in the batch and flow cells**

3 **Ram Ji Dixit<sup>a</sup>, Aditya Singh<sup>a</sup>, Vijay Ramani<sup>b\*</sup>, Suddhasatwa Basu<sup>a,c\*</sup>**

4 <sup>a</sup>Department of Chemical Engineering, Indian Institute of Technology Delhi, Hauz Khas,  
5 New Delhi 110016, India

6 <sup>b</sup>Department of Energy, Environmental & Chemical Engineering, Washington University in  
7 St. Louis, St. Louis 63130, Missouri, United States

8 <sup>c</sup>CSIR-Institute of Minerals and Materials Technology, Bhubaneswar 751013, India

9 \*corresponding author: sbasu@iitd.ac.in, ramani@wustl.edu

10

11

12

13

14

15

16

17

18

19

20

21

22

23

24

25

26

27

28

29

30

1

## Supplementary information

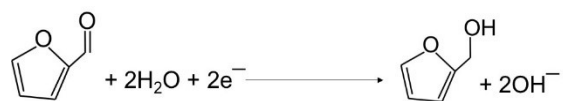

2 Cathode: Furfural (FF) Furfuryl alcohol (FA)

3

4 Photoanode:

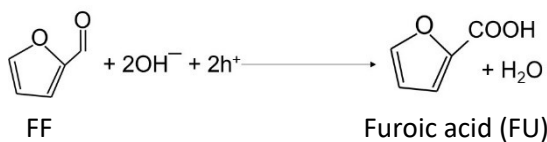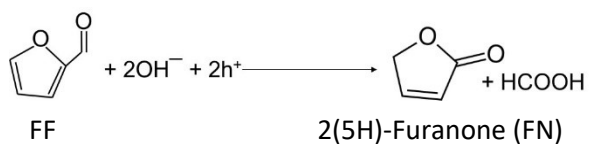

5

6

7

8 **Scheme S1.** Half-cell reactions at the Cu-Ni/NF cathode and TiO<sub>2</sub> NTs photoanode.

9

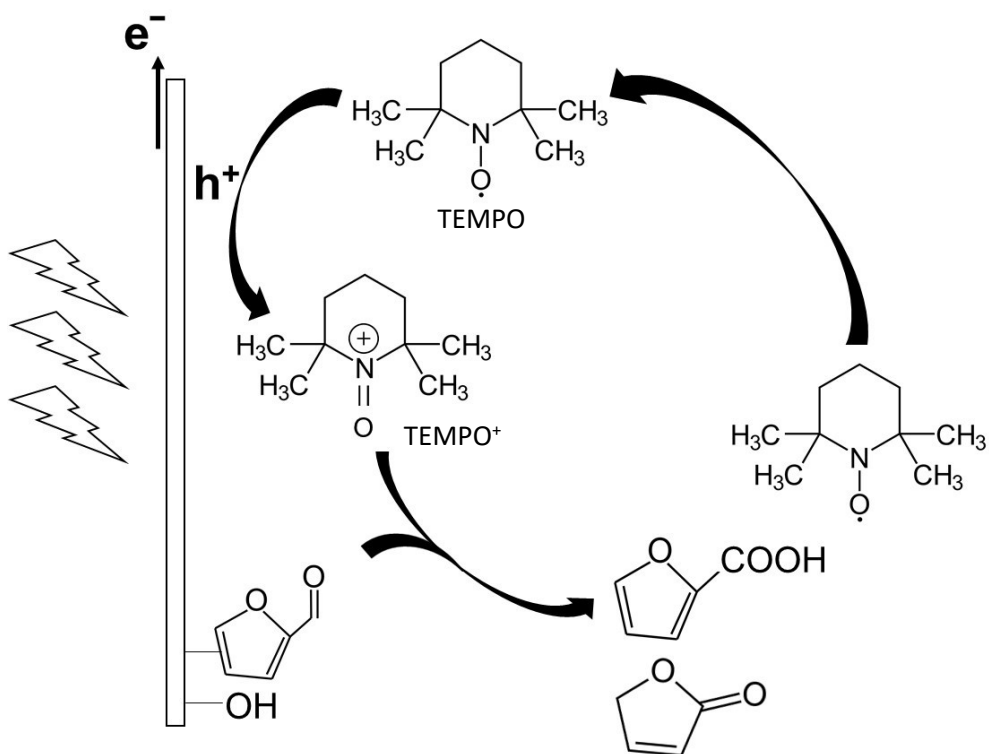

10

1 **Scheme S2.** TEMPO mediated FF oxidation at the TiO<sub>2</sub> NTs photoanode surface.

2

3

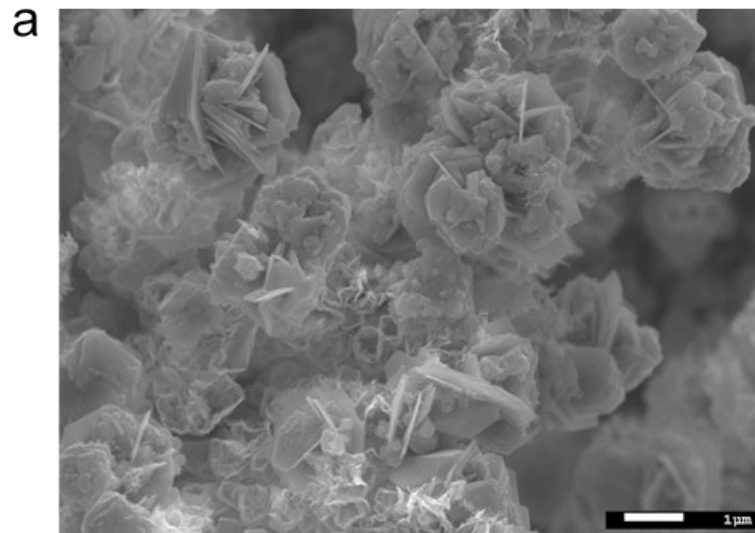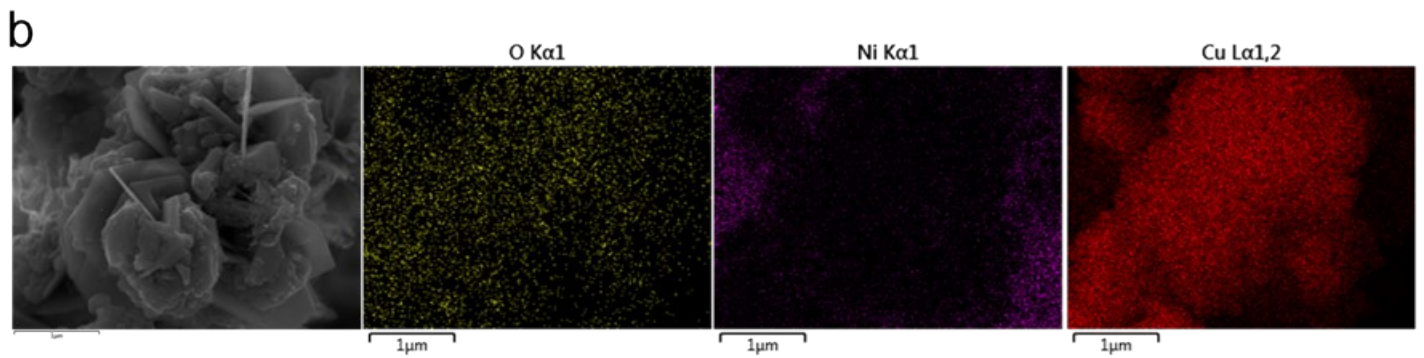

4

5

6 **Fig. S1. a.** SEM; **b.** EDX analysis of Cu-Ni/NF.

7

8

9

10

11

12

13

14

15

1  
2  
3

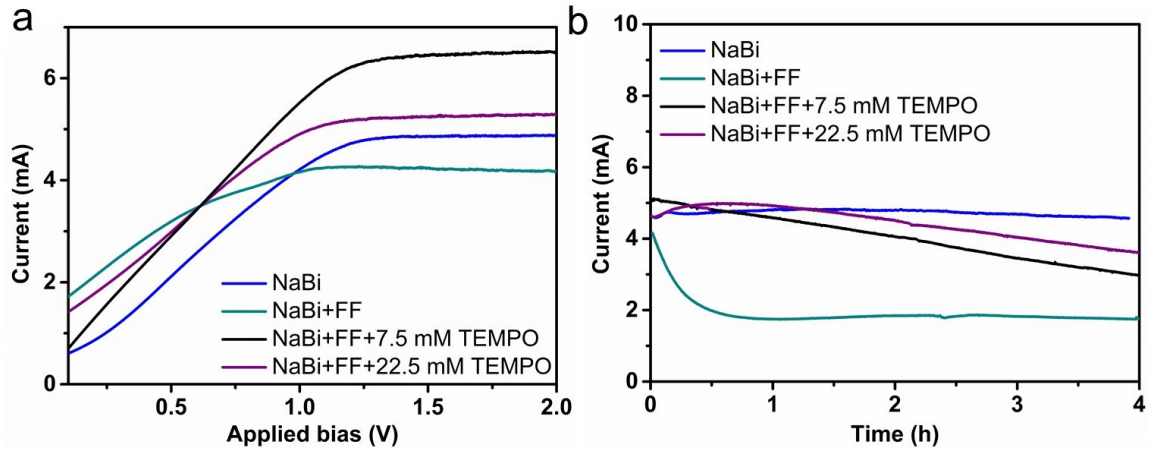

4  
5

6 **Fig. S2. Photoelectrochemical cell (PEC)** | a. Linear sweep voltammetry using analytes at the  
7 scan rate of  $20 \text{ mV sec}^{-1}$ ; b. Chronoamperometry. Analytes: NaBi, NaBi+FF, and  
8 NaBi+FF+7.5 mM TEMPO, NaBi+FF+22.5 mM TEMPO. Catholyte: NaBi+FF. Reaction  
9 condition: applied bias of 1 V for 4 h for chronoamperometry. PEC: Cu-Ni/NF cathode with  
10  $\text{TiO}_2$  NTs photoanode.

11  
12  
13  
14  
15  
16  
17  
18  
19

1

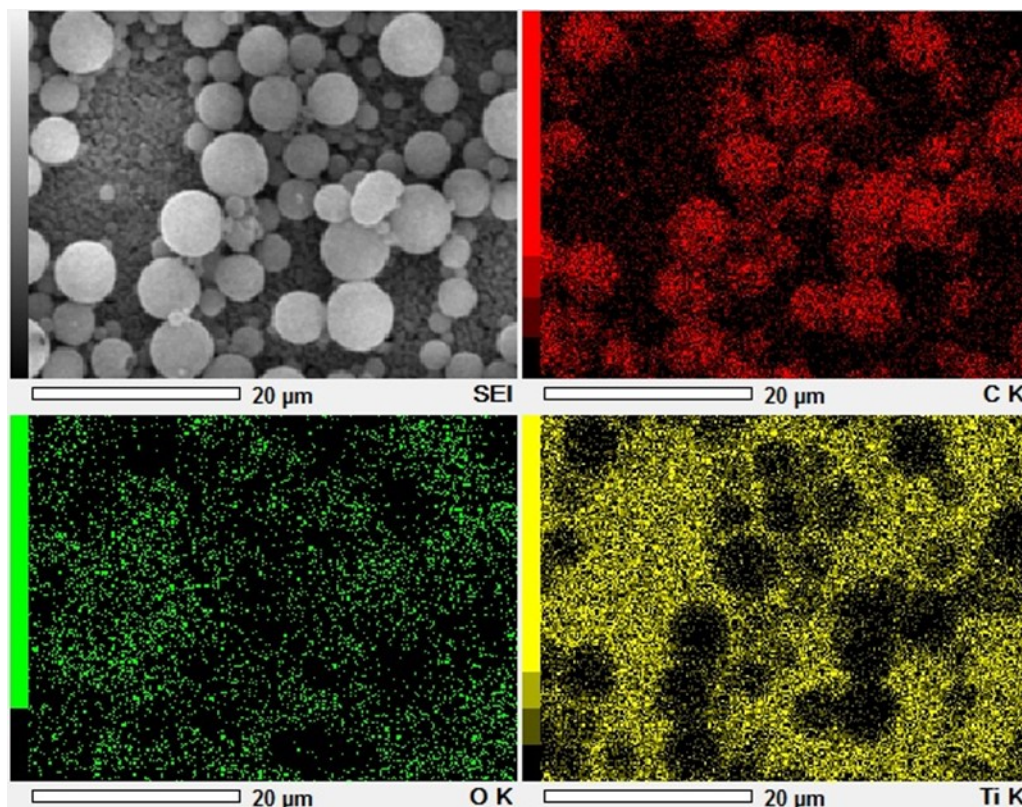

2

3 **Fig. S3.** SEM and EDX of photoanode after paired reaction (furfural electrocatalytic  
4 hydrogenation paired with photoelectrochemical oxidation) using NaBi+FF anolyte at 1 V for  
5 4 h in PEC. Catholyte: NaBi+FF, PEC: Cu-Ni/NF cathode and TiO<sub>2</sub> NTs photoanode.

6

7

8

9

10

11

12

13

14

15

16

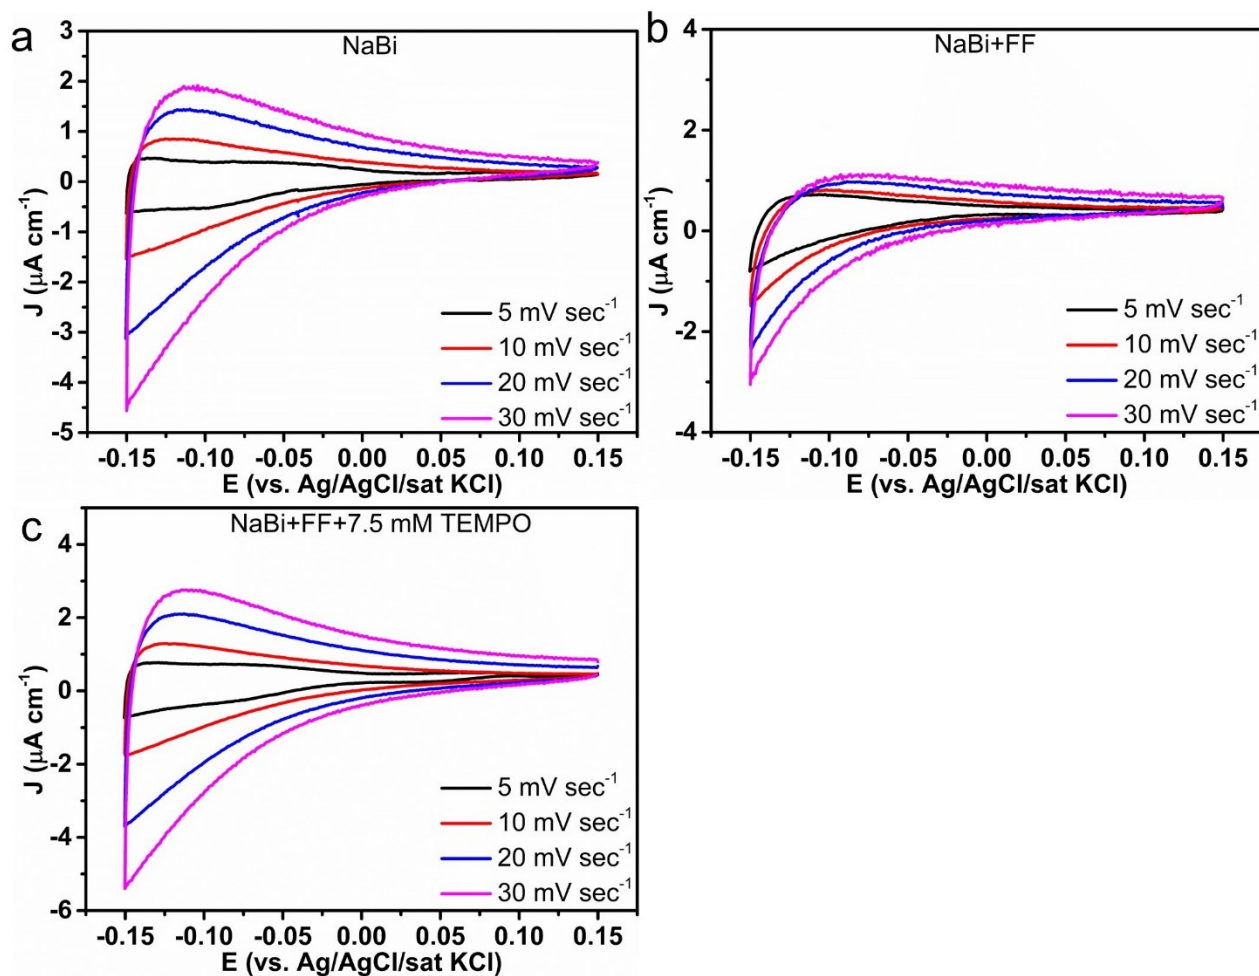

1

2 **Fig. S4.** CV in a 3-electrode undivided PEC under dark condition at the scan rate of 5, 10, 20,  
 3 30 mV sec<sup>-1</sup> using **a.** NaBi; **b.** NaBi+FF; **c.** NaBi+FF+7.5 mM TEMPO electrolytes.

4

5

6

7

8

9

10

11

12

13

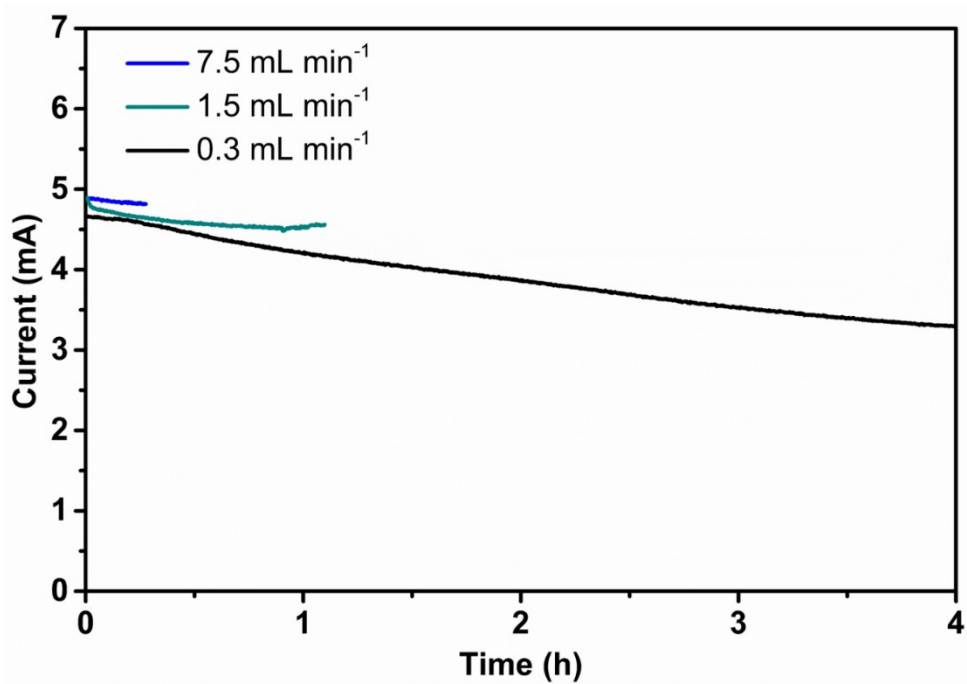

1

2

3 **Fig. S5.** Chronoamperometry in a flow PEC at the flow rate of 0.3, 1.5, 7.5 mL min<sup>-1</sup>.

4 Catholyte: NaBi+FF, anolyte: NaBi+FF+7.5 mM TEMPO. Reaction condition: applied bias of

5 1 V. PEC: Cu-Ni/NF cathode and TiO<sub>2</sub> NTs photoanode.

6

7

8

9

10

11

12

13

14

15
